# Supplementary material
Source: PubMed Central journal article supplement (PMC3138285)
Supplement: supp_M110.204503_jbc.M110.204503-1.pdf [file supp_M110.204503_jbc.M110.204503-1.pdf]

Experiment 1

| G0 ♀ Line                  | G1 |   |              |     |                  |   |
|----------------------------|----|---|--------------|-----|------------------|---|
|                            | G0 |   | Cy phenotype |     | non-Cy phenotype |   |
|                            | ♂  | ♀ | ♂            | ♀   | ♂                | ♀ |
| <i>UAS-Crk-IR</i> (19061)  | 3  | 5 | 287          | 302 | 0                | 0 |
| <i>UAS-Crk-IR</i> (106498) | 4  | 4 | 220          | 290 | 0                | 0 |
| <i>UAS-mbc-IR</i>          | 4  | 4 | 208          | 282 | 2                | 0 |

Experiment 2

| G0 ♀ Line                  | G1 |   |              |     |                  |   |
|----------------------------|----|---|--------------|-----|------------------|---|
|                            | G0 |   | Cy phenotype |     | non-Cy phenotype |   |
|                            | ♂  | ♀ | ♂            | ♀   | ♂                | ♀ |
| <i>UAS-Crk-IR</i> (19061)  | 8  | 7 | 265          | 289 | 0                | 0 |
| <i>UAS-Crk-IR</i> (106498) | 8  | 5 | 189          | 202 | 0                | 0 |
| <i>UAS-mbc-IR</i>          | 8  | 6 | 121          | 125 | 0                | 0 |

**SUPPLEMENTAL TABLE 1. Examination of development of flies where RNAi for *Crk* and *mbc* has been induced.** Female flies of the *UAS-IR* lines described in the legends for Supplemental Fig. 3 were mated with male flies (*Act5C-GAL4/CyO*) that expressed GAL4 under the *Actin 5C* promoter so that RNAi was induced in all cell types. Flies in the next generation were examined for the number of adults. Note that RNAi occurred in flies that had lost the *Cy* phenotype. The results in two independent experiments are shown.
