# Supplementary material
Source: PubMed Central journal article supplement (PMC3138285)
Supplement: supp_M110.204503_jbc.M110.204503-3.pdf [file supp_M110.204503_jbc.M110.204503-3.pdf]

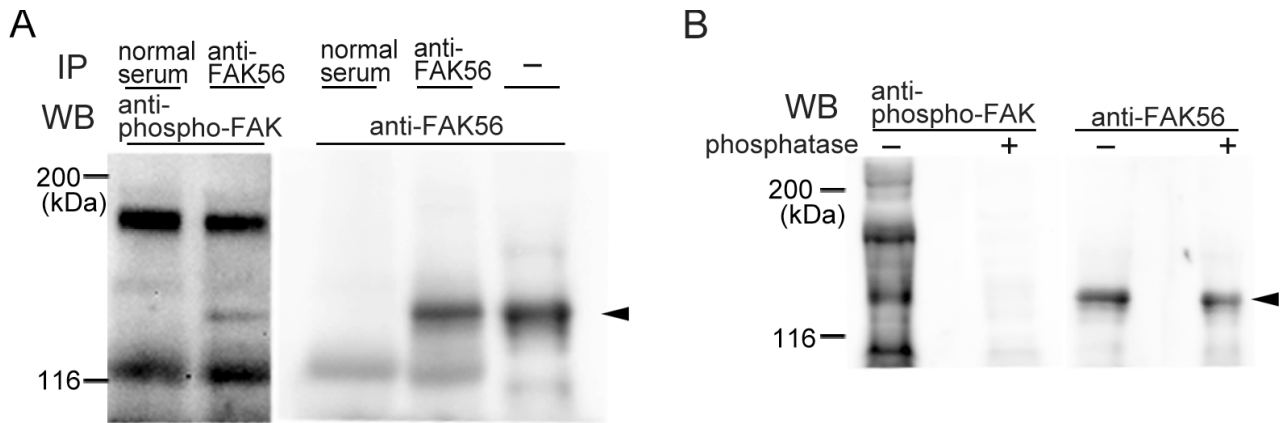

SUPPLEMENTAL FIGURE 2. **Detection of phosphorylated form of *Drosophila* FAK (FAK56) by Western blotting using antibody that recognizes phosphorylated form of mammalian FAK.** *A*, Lysates of l(2)mbn cells (1.0 mg of protein) were immunoprecipitated (*IP*) with the anti-FAK56 antibody then subjected to Western blotting (*WB*) with the anti-phospho-FAK antibody or anti-FAK56 antibody. *B*, The same cell lysates (0.18 mg of protein) were directly subjected to Western blotting with the anti-FAK56 antibody or anti-phospho-FAK antibody before (-) and after (+) the treatment of membranes containing transferred proteins with phosphatase. The arrowheads point to the positions of FAK56.
