# Supplementary material
Source: PubMed Central journal article supplement (PMC3138285)
Supplement: supp_M110.204503_SupplFig3.pdf [file supp_M110.204503_SupplFig3.pdf]

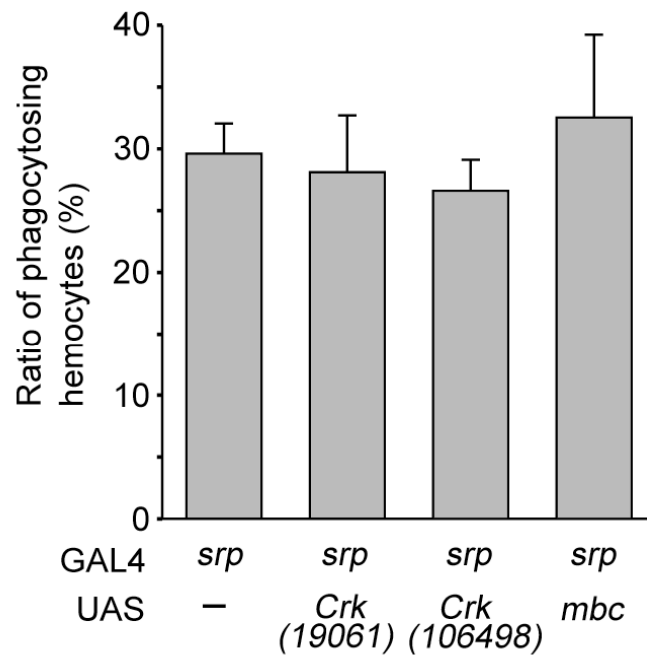

SUPPLEMENTAL FIGURE 3. **Examination of involvement of Crk and Mbc in phagocytosis of apoptotic cells by embryonic hemocytes.** Females of two *UAS-IR* lines for *Crk* RNAi (Transformant IDs 19061 and 106498 obtained from the Vienna Drosophila RNAi Center) and one *UAS-IR* line for *mbc* RNAi (Transformant ID 16044 from the Vienna Drosophila RNAi Center) were mated with male flies that expressed GAL4 under the *serpent* promoter so that RNAi was induced in hemocytes. Embryos in the next generation were analyzed for the phagocytosis of apoptotic cells by hemocytes. The ratio of hemocytes that had accomplished phagocytosis to total hemocytes is shown.
